# Supplementary material
Source: PubMed Central journal article supplement (PMC6535091)
Supplement: NIHMS1023038-supplement-Supplemental.pdf [file NIHMS1023038-supplement-Supplemental.pdf]

# European Journal of Immunology

Supporting Information

for

DOI 10.1002/eji.201243262

Virginie Rozot, Selena Vigano, Jesica Mazza-Stalder, Elita Idrizi, Cheryl L. Day, Matthieu Perreau, Catherine Lazor-Blanchet, Elisa Petruccioli, Willem Hanekom, Delia Goletti, Pierre-Alexandre Bart, Laurent Nicod, Giuseppe Pantaleo and Alexandre Harari

***Mycobacterium tuberculosis*-specific CD8<sup>+</sup> T cells are functionally and phenotypically different between latent infection and active disease**

# Supporting Information Figure 1

**A**

Gating strategy for ex vivo T-cell analysis

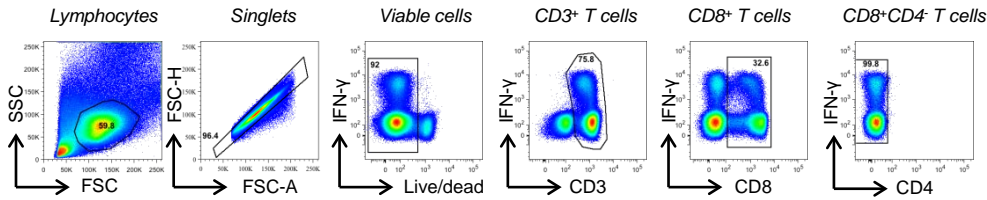

**B**

Gating strategy for in vitro expanded T-cell analysis

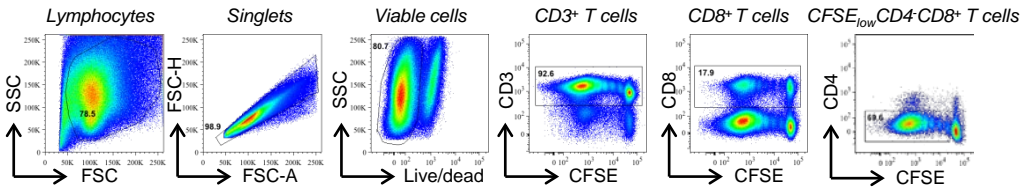

## Supporting Information Figure 1.

**Gating strategies for the flow cytometric analyses. (A)** Gating strategy for ex vivo analyses **(B)** Gating strategy for the analyses of in vitro T-cell expansion.

## Supporting Information Figure 2

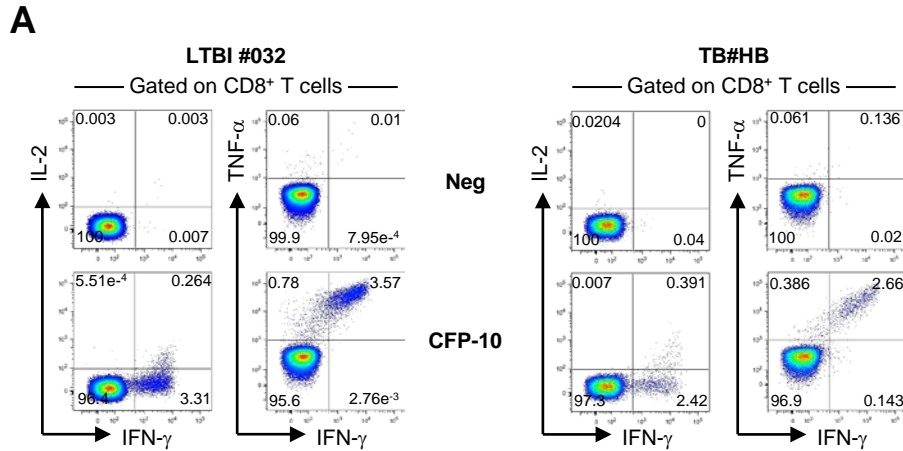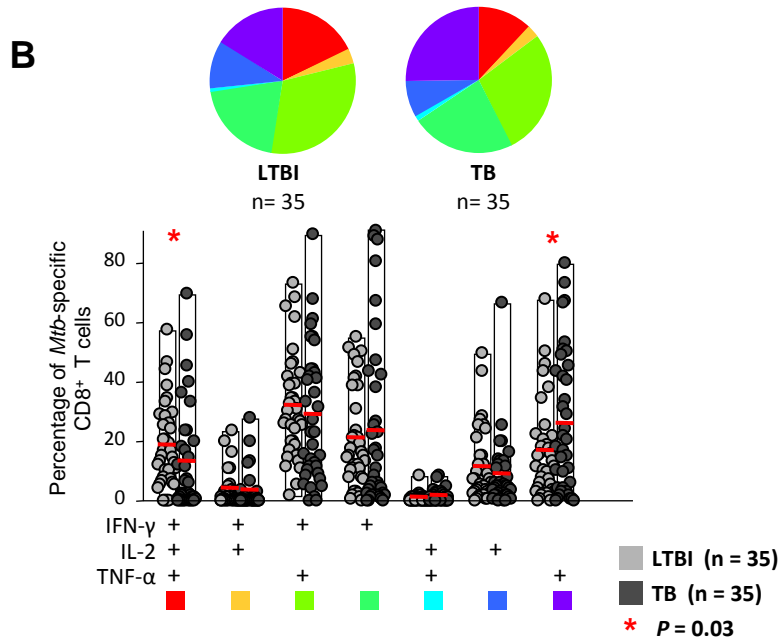

### Supporting Information Figure 2.

Representative flow cytometric profiles of LTBI subject and TB patients (A) and cumulative analyses (B) showing IFN- $\gamma$ , IL-2 and TNF- $\alpha$  expression on *Mtb*-specific CD8<sup>+</sup> T cells. Flow cytometry profiles are gated on live CD3<sup>+</sup>CD4<sup>-</sup>CD8<sup>+</sup> T cells. (B) All the possible combinations of the different markers are shown on the x axis whereas the percentages of the distinct T-cell subsets within *Mtb*-specific CD8<sup>+</sup> T cells are shown on the y axis.

### Supporting Information Figure 3

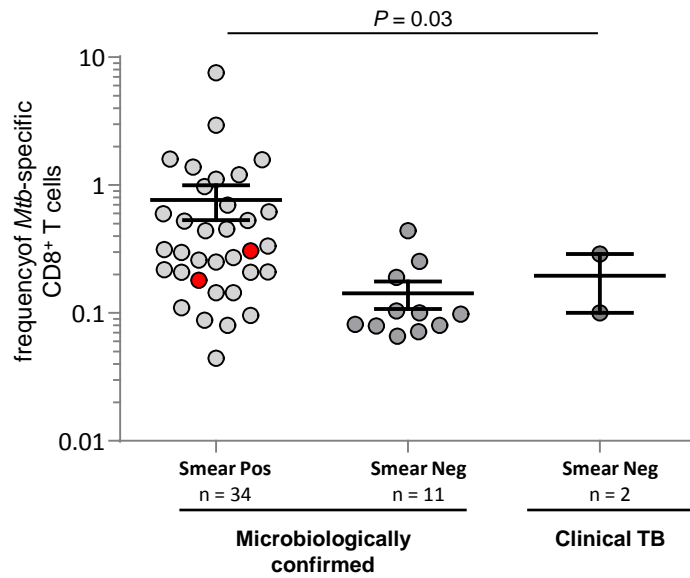

### Supporting Information Figure 3.

Frequency (mean $\pm$ SEM) of *Mtb*-specific IFN- $\gamma$ -producing CD8<sup>+</sup> T cells in microbiologically-confirmed and clinical PTB subdivided into smear-positive and smear-negative patients. An unpaired two-tailed student's t test was performed. Red points identify *Mtb*-specific CD8<sup>+</sup> T-cell responses from HIV-coinfected subjects.

## Supporting Information Figure 4

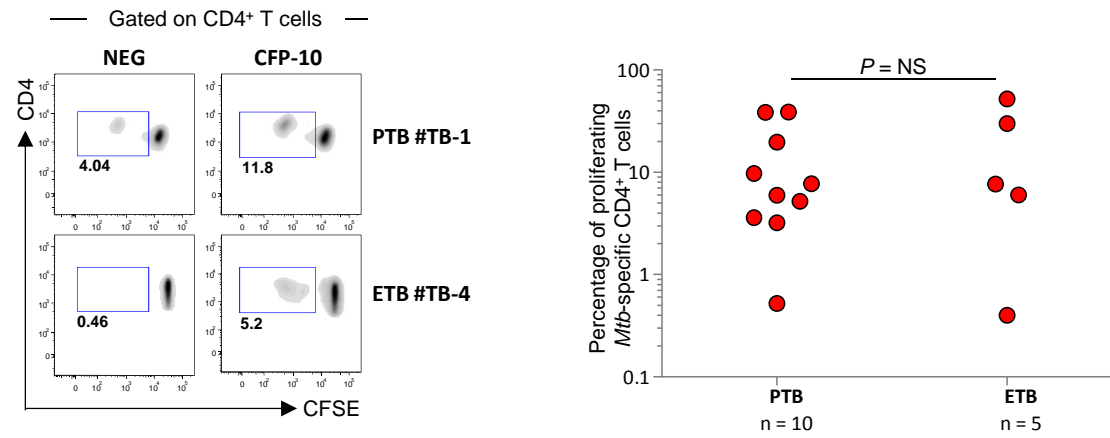

### Supporting Information Figure 4.

Proliferation capacity of *Mtb*-specific CD4<sup>+</sup> T-cell responses from the PTB and ETB patients shown in figure 4E.

## Supporting Information Figure 5

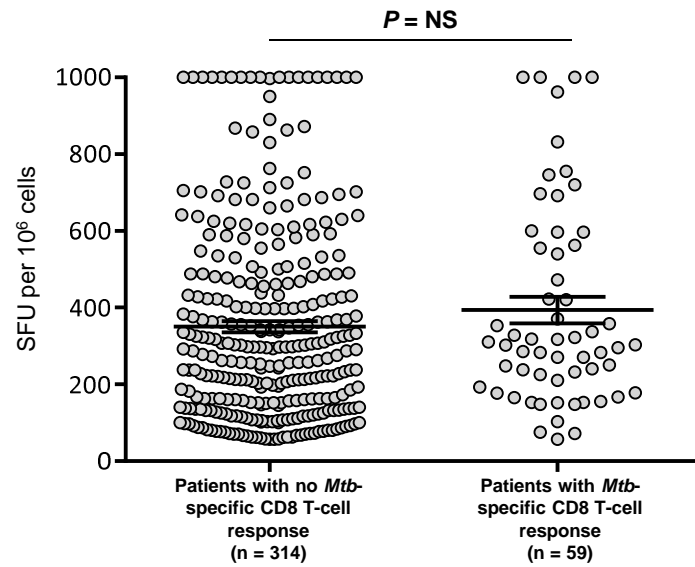

### Supporting Information Figure 5.

*Mtb*-specific IFN- $\gamma$  ELISpot responses in the 240 subjects with latent *Mtb* infection. Shown are the T-cell responses against ESAT-6 and/or CFP-10 peptide pools in the 203 subjects with no detectable *Mtb*-specific CD8 T-cell responses (left) and in the 37 subjects with detectable *Mtb*-specific CD8 T-cell responses (right). Bars represent mean $\pm$ SEM. An IFN- $\gamma$  ELISpot result was defined as positive if the number of SFUs was > 55 SFU/10<sup>6</sup> cells and > 4-fold the negative control. Statistical significance ( $P$  values) of the results was calculated by unpaired two-tailed student's  $t$  test using GraphPad Prism 5.

# Supporting Information Table 1

Demographic and clinical description of the 52 TB patients with *Mtb*-specific CD8+ T-cell responses

| Patient ID          | Gender | Age | TSR <sup>a</sup> | IGRA <sup>b</sup> | PCR | AFB <sup>c</sup> | Culture <sup>e</sup> | Clinics | Origin       | Comments                        |
|---------------------|--------|-----|------------------|-------------------|-----|------------------|----------------------|---------|--------------|---------------------------------|
| A4 <sup>d</sup>     | F      | 78  | / <sup>e</sup>   | +                 | +   | +                | +                    | +       | /            | ETB <sup>f</sup> /              |
| A5 <sup>d</sup>     | M      | 35  | /                | +                 | +   | +                | +                    | +       | /            | ETB                             |
| A8 <sup>d</sup>     | F      | 48  | /                | +                 | +   | +                | +                    | +       | /            | PTB <sup>g</sup> / HIV positive |
| CH-3 <sup>d</sup>   | M      | 76  | /                | +                 | +   | +                | +                    | +       | Switzerland  | PTB                             |
| CH-4 <sup>d</sup>   | M      | 29  | +                | +                 | +   | -                | +                    | +       | Somalia      | PTB                             |
| CH-5 <sup>d</sup>   | M      | 54  | /                | +                 | +   | +                | +                    | +       | Somalia      | PTB                             |
| RSA-1 <sup>d</sup>  | M      | 41  | /                | +                 | +   | +                | +                    | +       | South Africa | PTB                             |
| RSA-2 <sup>d</sup>  | M      | 59  | /                | +                 | +   | -                | +                    | +       | South Africa | PTB                             |
| RSA-3 <sup>d</sup>  | M      | 38  | /                | +                 | +   | -                | +                    | +       | South Africa | PTB                             |
| RSA-4 <sup>d</sup>  | M      | 31  | /                | +                 | +   | +                | +                    | +       | South Africa | PTB                             |
| RSA-5 <sup>d</sup>  | M      | 47  | /                | +                 | +   | -                | +                    | +       | South Africa | PTB                             |
| RSA-7 <sup>d</sup>  | M      | 54  | /                | +                 | +   | +                | +                    | +       | South Africa | PTB                             |
| RSA-8 <sup>d</sup>  | M      | 50  | /                | +                 | +   | -                | +                    | +       | South Africa | PTB                             |
| RSA-9 <sup>d</sup>  | M      | 38  | /                | +                 | +   | +                | +                    | +       | South Africa | PTB                             |
| RSA-10 <sup>d</sup> | M      | 51  | /                | +                 | +   | -                | +                    | +       | South Africa | PTB                             |
| RSA-11 <sup>d</sup> | M      | 23  | /                | +                 | +   | +                | +                    | +       | South Africa | PTB                             |
| TB-1                | F      | 39  | /                | +                 | -   | +                | +                    | +       | /            | PTB                             |
| TB-2                | H      | 83  | /                | /                 | /   | +                | +                    | +       | Switzerland  | PTB                             |
| TB-3                | M      | 27  | /                | +                 | /   | +                | +                    | +       | /            | PTB                             |
| TB-4                | H      | 24  | /                | +                 | -   | -                | +                    | +       | Somalia      | ETB                             |
| TB-5                | M      | 56  | /                | +                 | -   | -                | +                    | +       | Switzerland  | ETB                             |
| TB-6                | F      | 9   | /                | /                 | /   | -                | +                    | +       | Portugal     | ETB                             |
| TB-7                | F      | 31  | /                | +                 | -   | -                | +                    | +       | Portugal     | ETB                             |
| TB-8                | M      | 18  | /                | +                 | +   | -                | +                    | +       | /            | ETB                             |
| TB-9                | M      | 37  | /                | +                 | +   | -                | +                    | +       | /            | ETB                             |
| TB-10               | F      | 41  | +                | /                 | +   | -                | +                    | +       | Peru         | PTB                             |
| TB-11               | F      | 51  | /                | /                 | /   | -                | +                    | +       | Italy        | PTB                             |
| TB-12               | M      | 24  | /                | +                 | +   | -                | +                    | +       | South Africa | PTB                             |
| TB-13               | M      | 26  | +                | /                 | /   | -                | +                    | +       | Romania      | PTB                             |
| TB-14               | M      | 37  | /                | +                 | /   | -                | +                    | +       | South Africa | PTB                             |
| TB-15               | M      | 67  | /                | /                 | +   | -                | +                    | +       | Italy        | PTB                             |
| TB-16               | M      | 75  | +                | /                 | /   | -                | +                    | +       | Italy        | PTB                             |
| TB-17               | F      | 84  | /                | +                 | /   | +                | +                    | +       | Switzerland  | ETB                             |
| TB-18               | M      | 49  | /                | +                 | +   | +                | +                    | +       | Romania      | ETB                             |
| TB-19               | M      | /   | /                | +                 | /   | +                | +                    | +       | /            | ETB                             |
| TB-20               | F      | 30  | /                | /                 | /   | +                | +                    | +       | /            | PTB                             |
| TB-21               | F      | 33  | -                | +                 | +   | +                | +                    | +       | Poland       | PTB                             |
| TB-22               | F      | 39  | /                | +                 | +   | +                | +                    | +       | /            | PTB                             |
| TB-23               | F      | 46  | /                | /                 | /   | +                | +                    | +       | /            | PTB                             |
| TB-24               | F      | 52  | /                | +                 | /   | +                | +                    | +       | /            | PTB                             |
| TB-25               | M      | 21  | +                | +                 | +   | +                | +                    | +       | Romania      | PTB                             |
| TB-26               | M      | 29  | +                | /                 | +   | +                | +                    | +       | India        | PTB                             |
| TB-27               | M      | 33  | -                | +                 | +   | +                | +                    | +       | Romania      | PTB                             |
| TB-28               | M      | 33  | /                | +                 | /   | +                | +                    | +       | South Africa | PTB                             |
| TB-29               | M      | 35  | /                | /                 | +   | +                | +                    | +       | Romania      | PTB                             |
| TB-30               | M      | 36  | +                | /                 | +   | +                | +                    | +       | Romania      | PTB                             |
| TB-31               | M      | 36  | +                | +                 | +   | +                | +                    | +       | Romania      | PTB                             |
| TB-32               | M      | 37  | /                | +                 | +   | +                | +                    | +       | South Africa | PTB                             |
| TB-33               | M      | 47  | +                | /                 | +   | +                | +                    | +       | Romania      | PTB                             |
| TB-34               | M      | 52  | +                | /                 | +   | +                | +                    | +       | Romania      | PTB                             |
| TB-35               | M      | 63  | /                | -                 | +   | +                | +                    | +       | Italy        | PTB                             |
| TB-36               | /      | /   | /                | +                 | /   | +                | /                    | +       | South Africa | PTB                             |

<sup>a</sup> Tuberculin Skin test. <sup>b</sup> IFN- $\gamma$  Release assay (IFN- $\gamma$  ELISpot or Quantiferon). <sup>c</sup> AFB (acid-fast bacilli) and culture performed according to Murray *et al*, Manual of Clinical Microbiology, American Society of Microbiology. <sup>d</sup> Previously described patients (Hatari *et al*, Nature medicine 2011;17:372-6). <sup>e</sup> Not done/Missing data. <sup>f</sup> Extrapulmonary TB and <sup>g</sup> Pulmonary TB (according to WHO guidelines ([www.who.int](http://www.who.int))).
